# Supplementary material for: Identification of Biomarkers Including 18FDG-PET/CT for Early Prediction of Response to Neoadjuvant Chemotherapy in Triple-Negative Breast Cancer
Source: Oxford University Press journal article supplement (doi:10.1158/1078-0432.ccr-15-0384), 2015-07-01

**Figure 1 (online): Graphical display of changes in primary tumor SUVmax between baseline and interim 18F-FDG PET exams.**


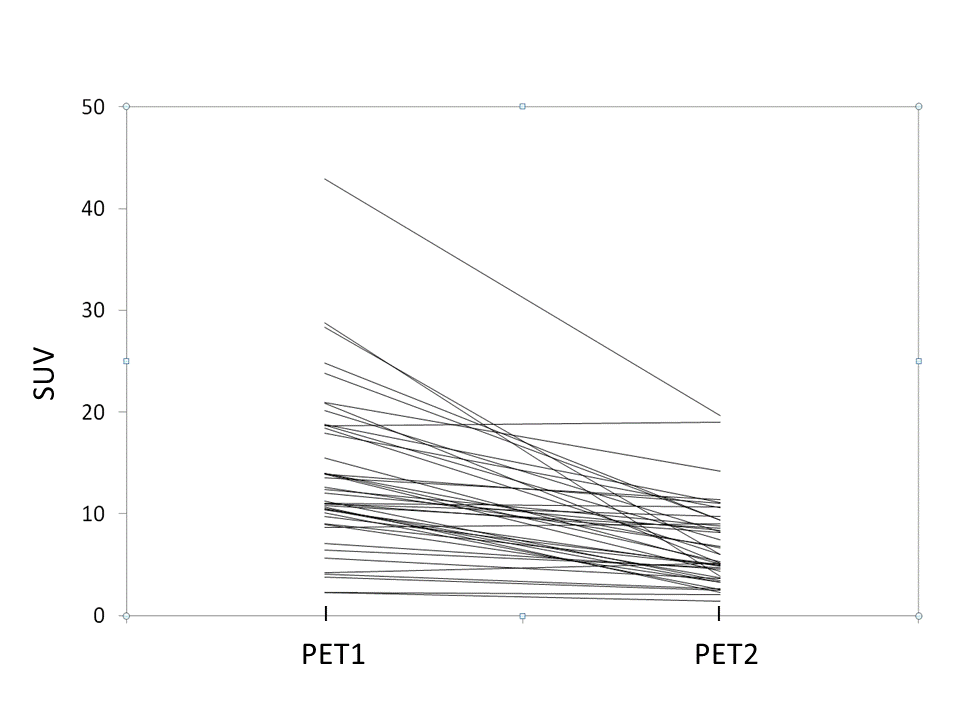

Supplement: 10780432ccr150384-sup-145360_1_figure_3001556_np9qth.docx [file 10780432ccr150384-sup-145360_1_figure_3001556_np9qth.docx]
